# Supplementary material for: Experimental approaches for size-based metal speciation in riversElectronic supplementary information (ESI) available: Experimental details, tables A?D showing parameters for GF and AAS, detection limits for ETAAS, SdFFF operative parameters and metal concentrations determined in the void time at the two different pH values, and SEM images of the void time fractions. See http://www.rsc.org/suppdata/em/b3/b308877d/
Source: Royal Society of Chemistry journal article supplement (doi:10.1039/b308877d), 2003-01-01
Supplement: b308877d.doc [file b308877d.doc]

# This journal is © The Royal Society of Chemistry 2003

# Experimental Approaches for Size-Based Metal Speciation in Rivers

# Catia Contado, Gabriella Blo, Chiara Conato, Francesco Dondi* and Ron Beckett1

*Department of Chemistry, University of Ferrara, via L. Borsari 46, I-44100 Ferrara (Italy)*

*(*)e.mail:* [*mo5@unife.it*](mailto:mo5@unife.it) *- tel: +39 0532 291154 – fax +39 0532 240709*

*(1)* *Water Studies Centre, Building 19, Clayton Campus, Monash University, Wellington Road, Clayton 3168. (Australia)*

# Supplementary information

**Experimental**

*Instruments*:

The SdFFF was a Model S101 (FFFractionation, Inc., Salt Lake City, UT) with hastelloy C channel walls. The channel, cut from a mylar spacer of nominal thickness 0.0254 cm, had a void volume of 4.86 mL. An HPLC Pump model 422 Master (Kontron Instruments, Italy) was used to deliver the carrier. The outlet tube from the channel was connected to a UV detector operating at 254 nm (Uvidec 100, Jasco Ltd., Japan). The signal *c*(*tr*) was fed to a Linseis Model L 6512 X-Y recorder (Linsel GMB, Germany). Signal data were also collected by an ACRO-900 12 bit I/O acquisition system (Acrosystems Co. Beverly, MS, USA). A 2110 Bio-Rad fraction collector (Bio-Rad Laboratories, Richmond, CA) was used to collect the SdFFF fractions.

1100 Perkin-Elmer Atomic Absorption Spectrometer with an Intensitron hallow cathode lamp, a deuterium corrector and equipped with an HGA-500 graphite furnace, was used to determine element concentrations.

# The operating conditions for ETAAS determination are reported in Tab. A. The calibration concentration range is 5 – 30 g/L for Cr, 5 – 50 g/L for Cu, 0 -100 g/L for Al, 0-30 g/L for Fe and 0 – 10 g/L for Mn. Detection limits for AAS determination are listed in Tab. B.

# *Reagents*

Carrier solutions were prepared with Milli-Q deionised water, NaHCO3 (Carlo Erba RPE), HCl 30% suprapur (Merk). CuNO3 copper nitrate (BDH Chemicals Ltd Spectrosol) and CrNO3 chromium nitrate (BDH Chemicals Ltd) were utilised to obtain the reinforced sample.

# Standards for ETAAS analysis were prepared from BDH Chemical Ltd solutions (1000 mg/L of metal).

# *Preparation of the samples*

Po River water was collected with a Van Dorn bottle 2 m below the surface. pH (7.9), alkalinity, hardness and conductivity were measured in the laboratory and were 283.92 mg l-1 NaHCO3, 18.7 °F and 455 S, respectively. River water sample was filtered through Whatman 542 filter paper (nominal pore size 20-25 m) and the filtrate was concentrated (104:1) by a further filtration through a 0.2 m Durapore membrane filter (Millipore Co., Bedford, MA). The suspended solid concentration in the original Po River sample, in the size range 0.2-25 m, was 7.50 mg l-1.

For SdFFF analysis, particles > 1 m were eliminated from the sample, to avoid complications caused by simultaneous elution of particles separated by either normal mode (smaller particles) or steric mode (larger particles). This was achieved using a settling procedure, repeated several times, by which particles larger than 1 m were removed from the concentrated slurry [see ref. 47 for the theory]. The obtained suspended solid concentration in this sample, containing particles < 1 m, was 530 mg l-1. A further concentration by a factor of 10:1 was obtained by centrifugation at 3500 rev min-1 for 15 min, before SdFFF runs.

For copper and chromium distribution studies, 20 ml of the suspension (< 1 m) were equilibrated with 2.5 mg l-1 of copper nitrate and chromium nitrate. After 18 hours of equilibration, the sample was divided in two aliquots and each aliquot (10 ml) was filtrated through 0.1 m Millipore VCTP01300 filters. The two solid samples (the filter retentate) were then suspended respectively in 1 ml of bicarbonate buffer at pH 7.5 and 8.5.

Sample fractions were collected during the SdFFF runs. Runs were performed by means of two different buffered carriers: bicarbonate buffer at pH 7.5 and at pH 8.5. Injection volume was 50 l, eluent flow 2 ml/min and the fraction was collected every 1.5 minutes (3 ml each fraction). Total analysis time was 60 min, corresponding to a elution volume of 120 ml. SdFFF parameters are listed in Tab. C. In order to check particle dimensions on the obtained fractions, SEM images were made: the fraction content was filtered on Millipore membrane 0.1 µm in order to collect the particles and the filters were glued to aluminum stubs with colloidal graphite and coated with Au for the SEM analysis (Fig. 1).

Cu and Cr contents (besides Al, Fe and Mn) were analysed by ETAAS (together with Fe, Al and Mn) on the SdFFF void time and on some representative fractions.

**Figure captions**

**Tab. A -** Parameters used for the graphite furnace and atomic absorption spectrometer (the absorption measure is taken during the atomisation step).

**Tab. B** – Detection Limits for ETAAS determinations.

**Tab. C**– SdFFF operative parameters.

**Tab. D** – Metal concentration determined in the void time at the two different pH values.

**Fig. 1** – SEM images of the void time fractions: (a) pH 8.5; (b) pH 7.4

**Fig. 1**

Tab. A

| Parameters | Step | | | | |
| --- | --- | --- | --- | --- | --- |
| Drying | Ashing | Atomisation | Clean up | Cooling |
| Temp. for Al (°C) | 100 | 1250 | 2400 | 2600 | 20 |
| Temp. for Fe (°C) | 100 | 1100 | 2400 | 2600 | 20 |
| Temp. for Mn (°C) | 100 | 1000 | 2200 | 2600 | 20 |
| Temp. for Cu (°C) | 100 | 1000 | 2300 | 2600 | 20 |
| Temp. for Cr (°C) | 100 | 1250 | 2400 | 2600 | 20 |
| Temp. for Pb (°C) | 100 | 600 | 2400 | 2700 | 20 |
| Ramp time (sec) | 15 | 15 | 0 | 1 | 1 |
| Hold time (sec)- *a) Al, Cr, Mn;Pb b) Fe e Cu* | *a)* 50; *b)* 40 | 30 | 5 | 3 | 10 |

Tab B

| **Element** | **D.L.**  **µgL-1** |
| --- | --- |
| Al | 0.583 |
| Fe | 3.265 |
| Mn | 0.536 |
| Cu | 1.013 |
| Cr | 0.341 |

Tab. C

| Initial field (rev min-1) | 200 |
| --- | --- |
| Relaxation time (min) | 5 |
| Hold (rev min-1) | 200 |
| t1 (min) | 10 |
| ta (min) | -53 |
| Flow rate (ml min-1) | 2 |

Tab. D

| **Elements** | **pH 7.4**  **µg L-1** | **pH 8.5**  **µg L-1** |
| --- | --- | --- |
| Al | 28.6 ± 0.5 | 75.8 ± 0.5 |
| Fe | 9.0 ± 0.4 | 30.0 ± 0.5 |
| Mn | 2.4 ± 0.3 | 3.0 ± 0.4 |
| *Cu | 11.1± 0.4 | 23.2 ± 0.5 |
| *Cr | 9.7 ± 0.4 | 25.0 ± 0.5 |

(*)“strengthened” samples.
